# Supplementary material for: JMJD6 Dysfunction Due to Iron Deficiency in Preeclampsia Disrupts Fibronectin Homeostasis Resulting in Diminished Trophoblast Migration
Source: Frontiers journal article supplement (doi:10.3389/fcell.2021.652607), 2021-05-12
Supplement: Data_Sheet_1.PDF [file Data_Sheet_1.PDF]

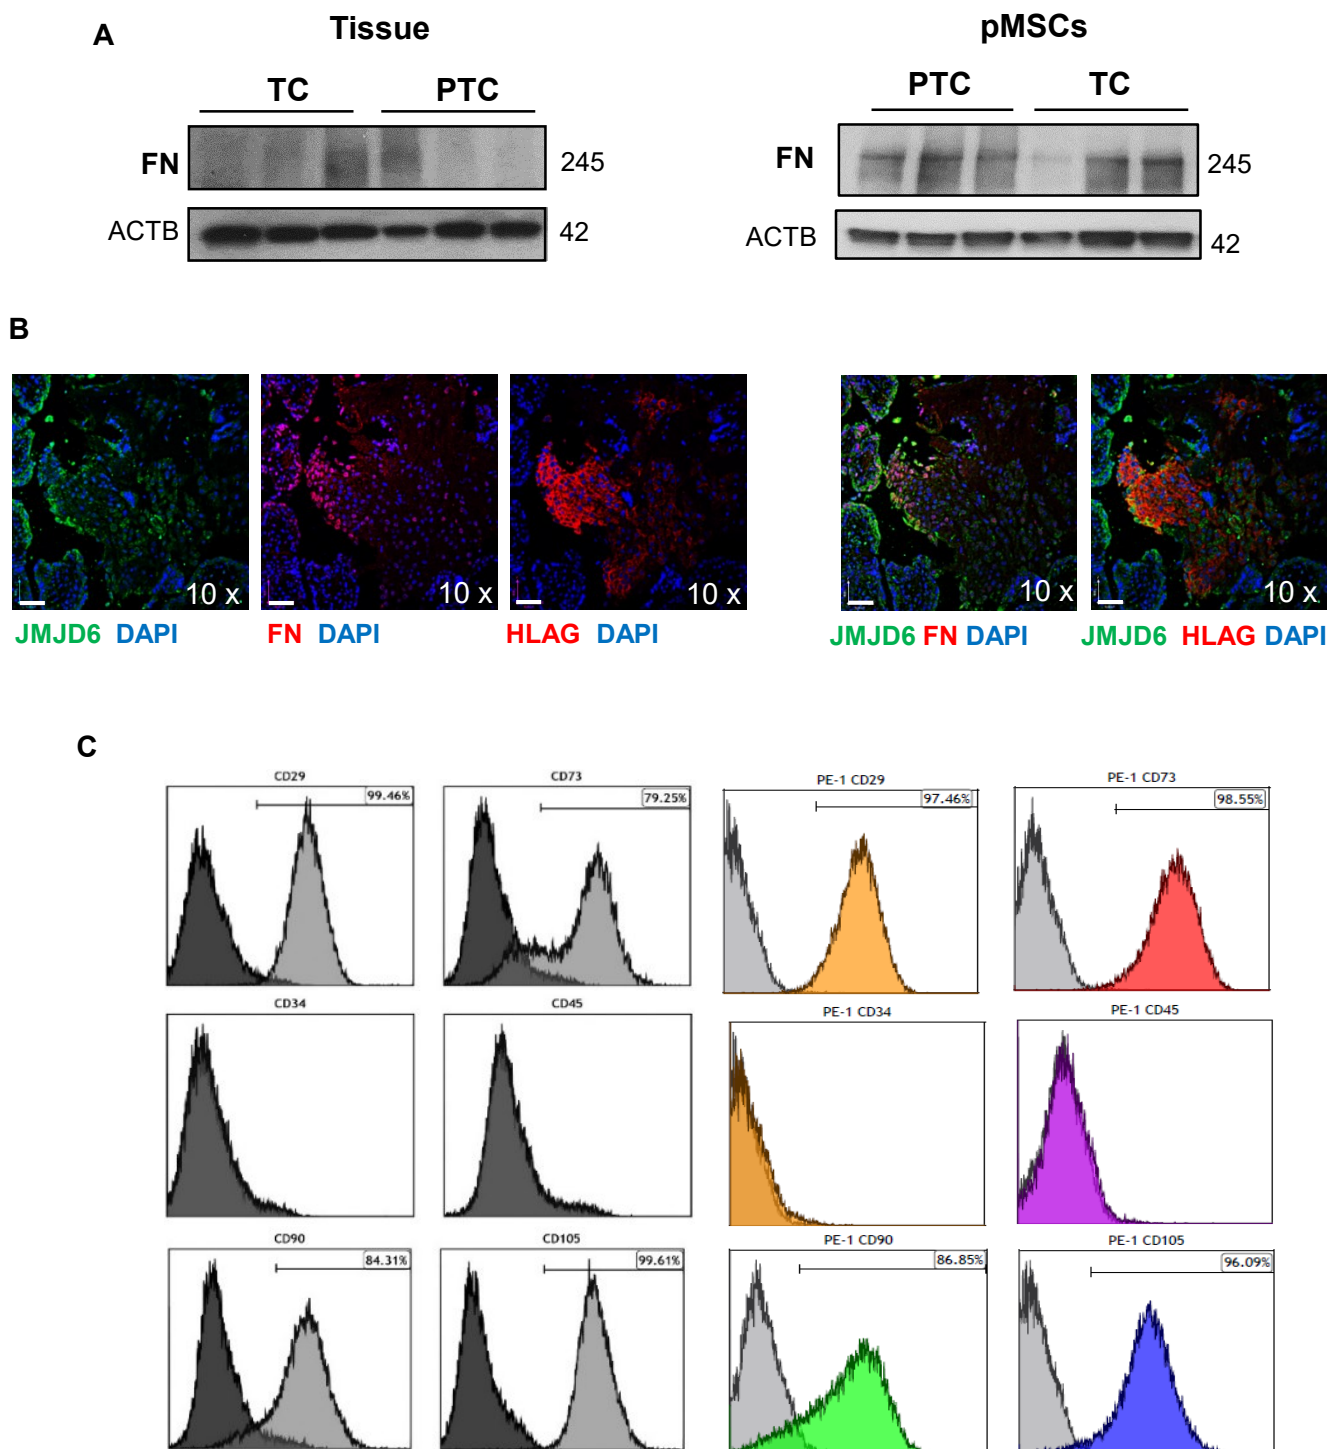

**Supplementary Figure 1 – FN characterization in placental tissue and mesenchymal stromal cells (A) Representative Western blots of FN in pre-term control (PTC, n=9 ) versus term control (TC, n=8) placental tissue (left panel) and pMSCs (right panel). (B) IF analysis of JMJD6 (green), FN (red) and HLAG (red) in consecutive chorionic villus sections from a first trimester placenta (11 weeks gestation). Nuclei were counter-stained with DAPI. Scale bars at 10 X magnification represent 1.1  $\mu$ M. (C) Fluorescent activated cell sorting (FACS) analyses of representative 7-week (left panels) and PE (right panels) pMSCs demonstrating the presence of mesenchymal stromal cell surface markers CD29, CD73, CD90 and CD105 and lack of hematopoietic markers, CD34 and CD45.**

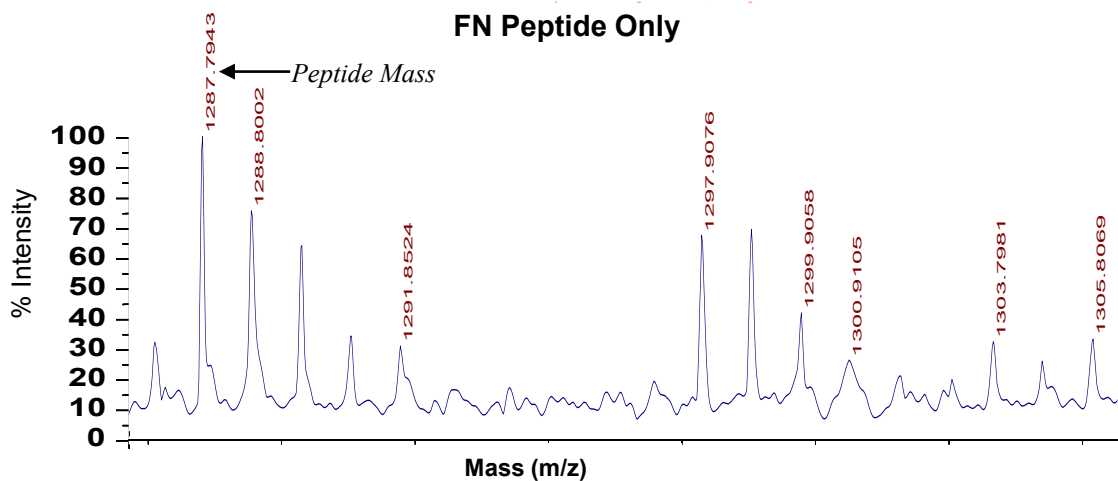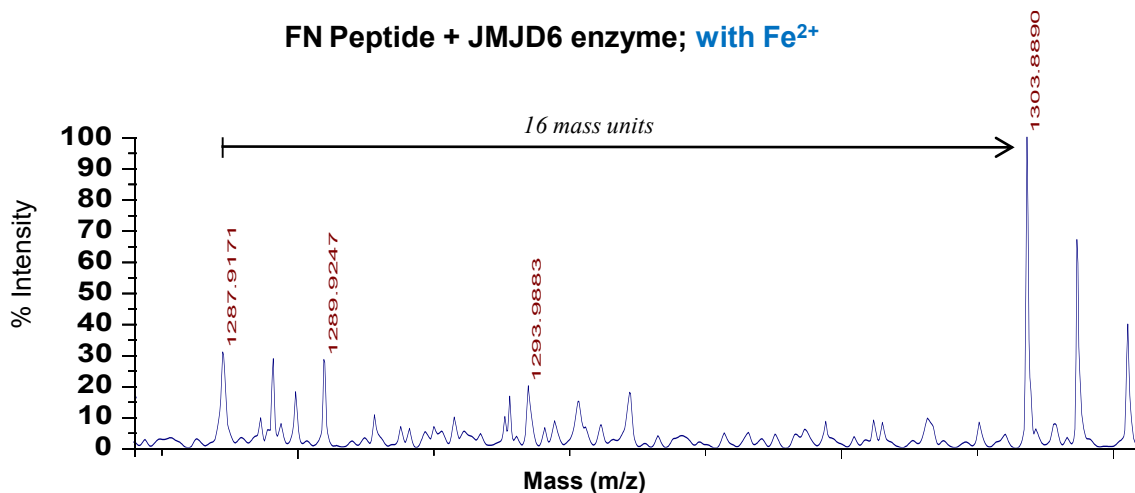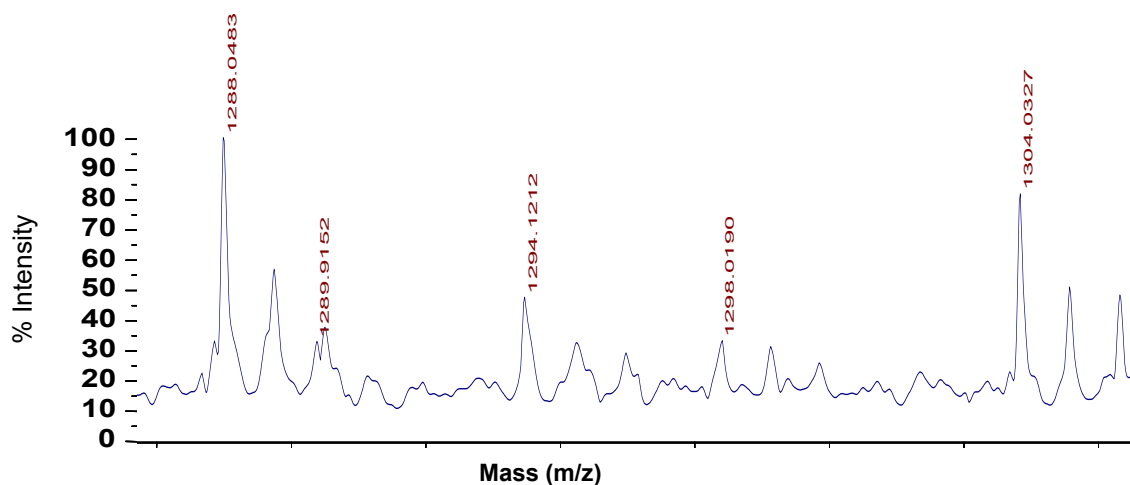

**Supplementary Figure 2 – Iron is required for FN lysyl hydroxylation by JMJD6.** Representative mass spectra for FN peptide showing the original peptide mass (top panel) and a 16-mass unit shift upon incubation with recombinant JMJD6 enzyme in the presence of ferrous iron (Fe<sup>2+</sup>; middle panel) and to a lesser extent in the absence of Fe<sup>2+</sup> (bottom panel).

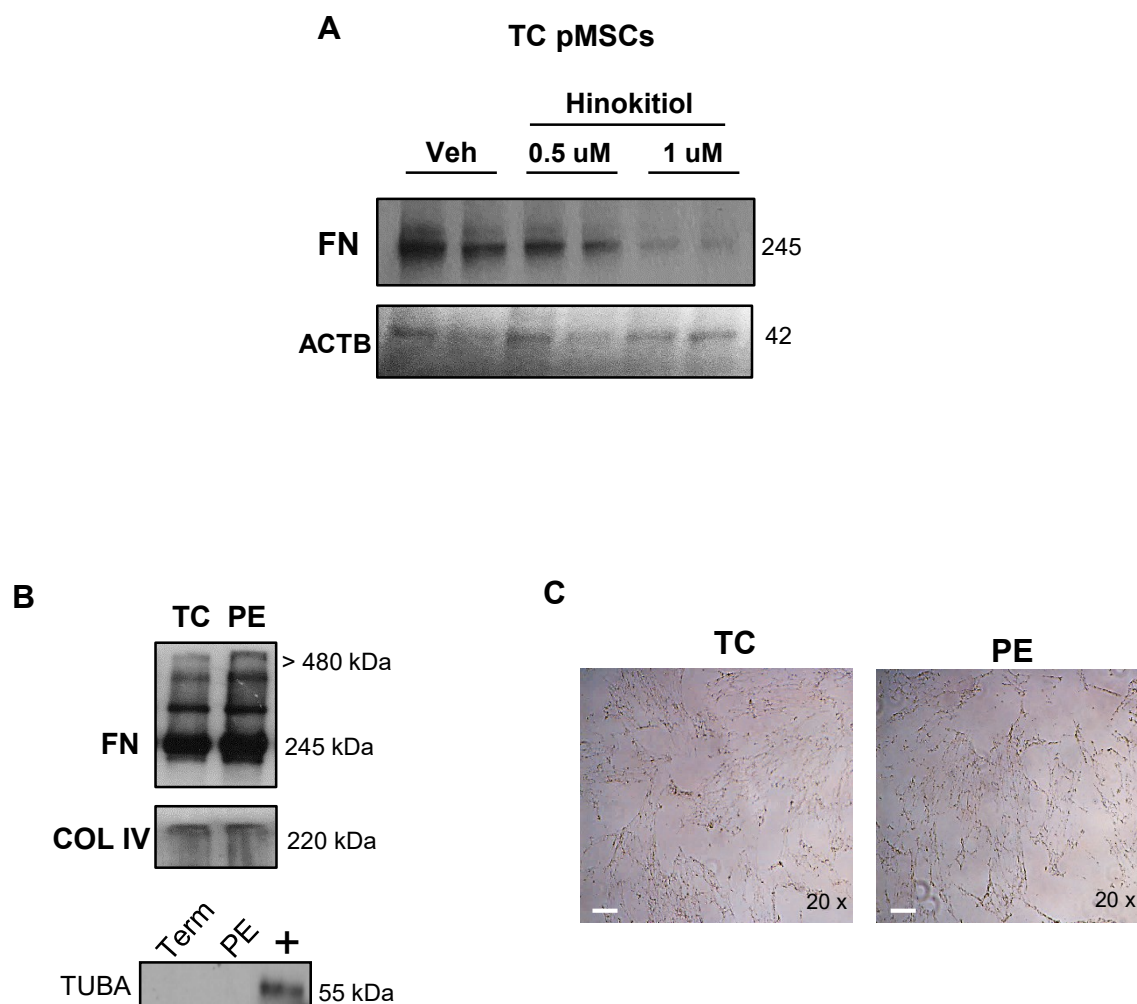

**Supplementary Figure 3 – Effect of Hinokitiol on control pMSCs and characterization of ECM isolated from pMSCs.** (A) WB for FN in Term pMSCs exposed to 0.5 or 1  $\mu$ M Hinokitiol for 24 h. (B) WB for FN, Collagen IV (COL IV; (top panel) and  $\alpha$ -tubulin (TUBA; bottom panel) in ECM isolated from TC and PE pMSCs. + = whole cell pMSC lysate as positive control for TUBA expression. (C) Representative phase contrast images of ECM isolated from TC and PE pMSCs. Scale bars represent 2.2  $\mu$ m at 20 x magnification.

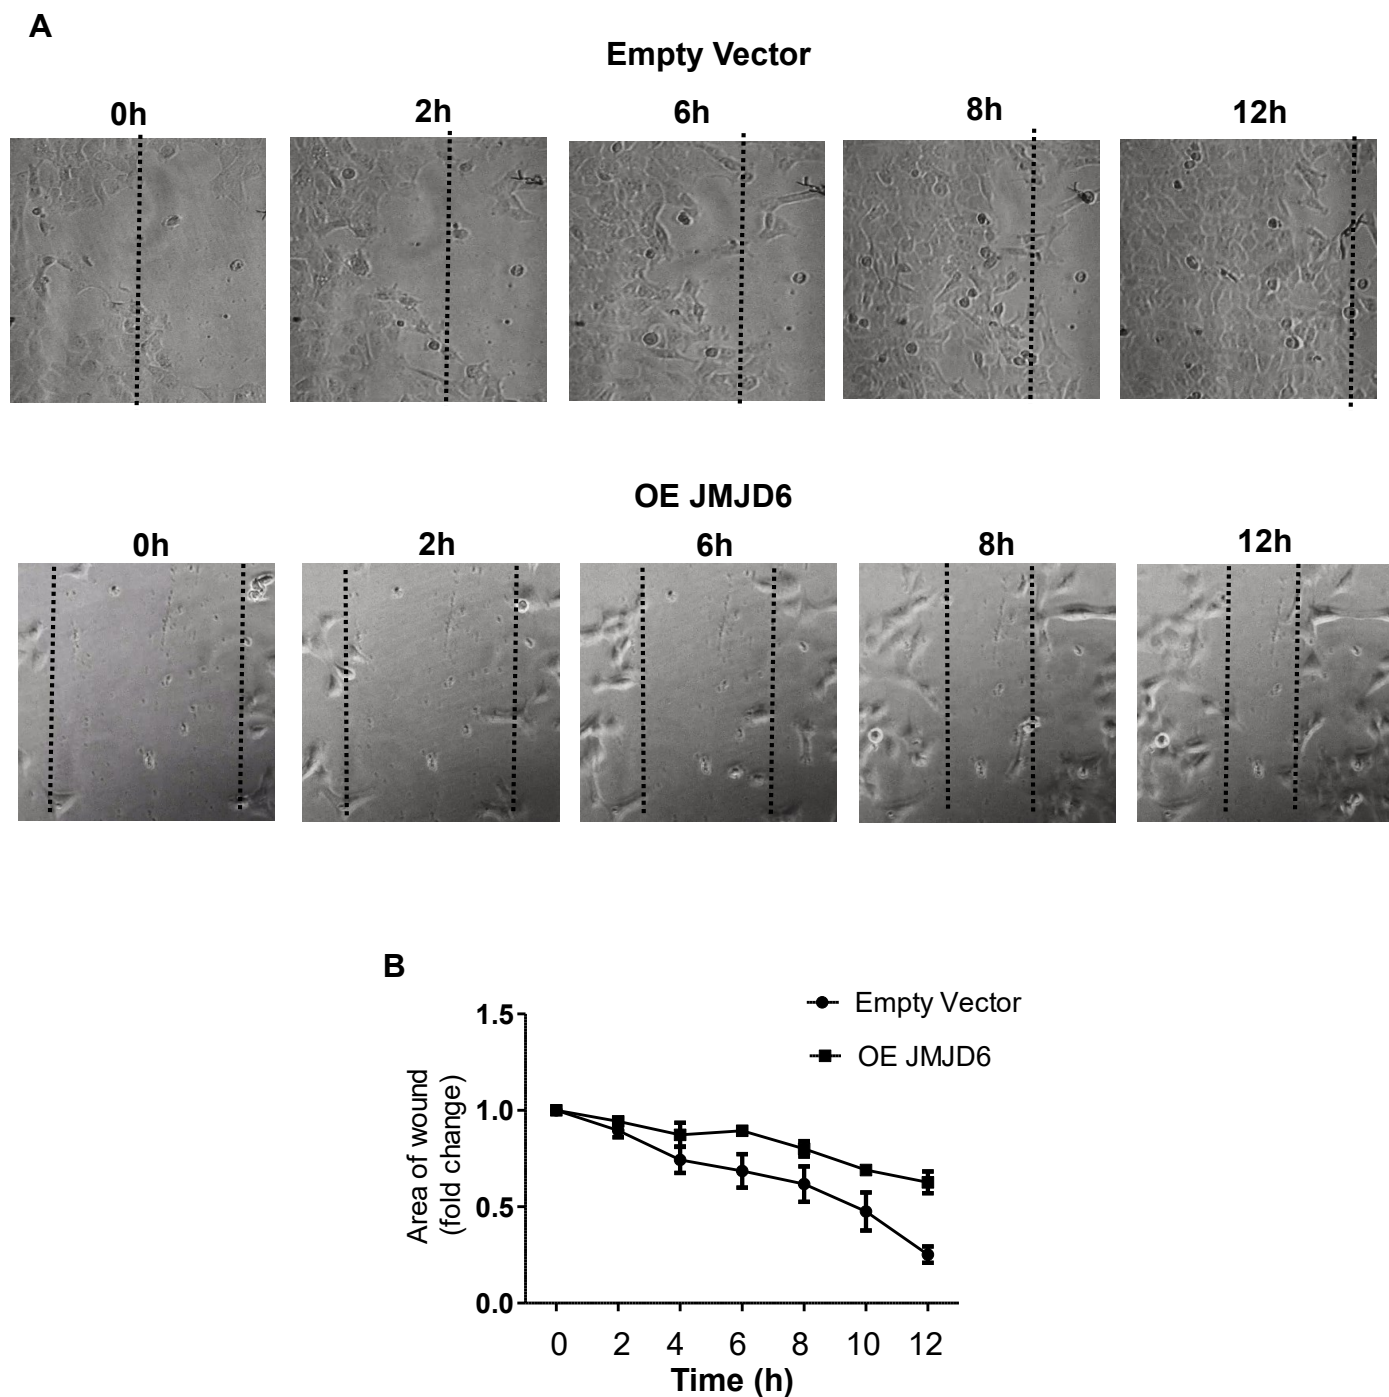

**Supplementary Figure 4 – JMJD6 overexpression in pMSCs impedes HTR-8/SVneo migration *in vitro*.** (A) Representative snapshots of HTR-8/SVneo cell migration over time on ECM deposited by TC pMSCs transfected with empty vector control or 0.5 µg JMJD6 vector. (B) Graphical representation of HTR-8/SVneo cell migration on TC pMSC-derived ECM following JMJD6 OE, expressed as area of wound closure over time.

**A****Control****1  $\mu$ M RGD**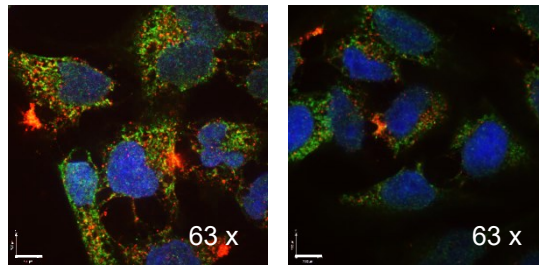**FN  $\alpha$ 5 $\beta$ 1 integrin DAPI****B****Vehicle****0h****2h****6h****8h****12h**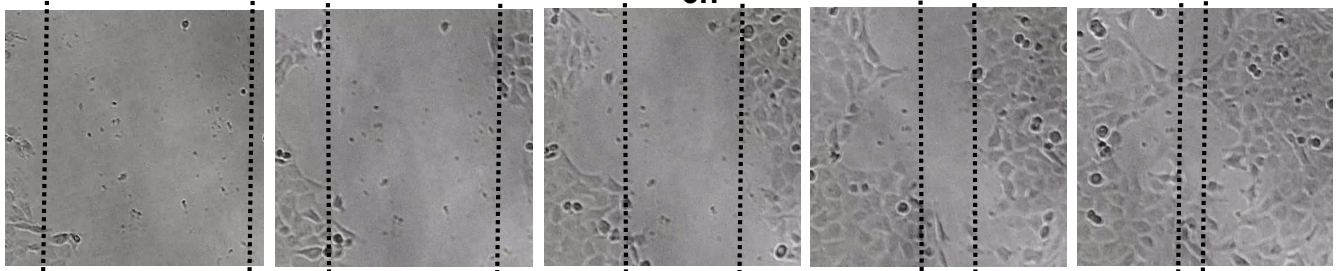**+ 1  $\mu$ M RGD Peptide****0h****2h****6h****8h****12h**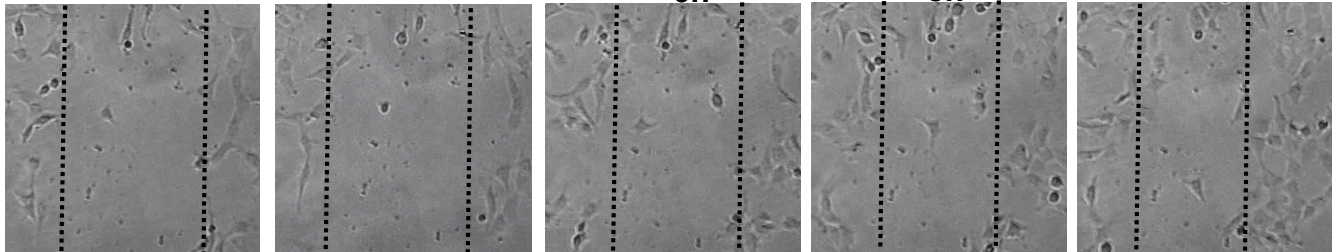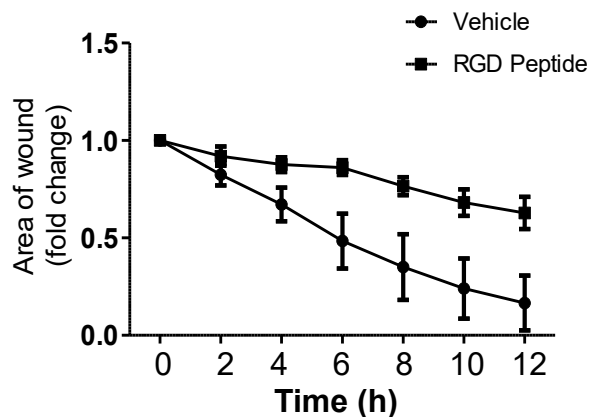

**Supplementary Figure 5 – Inhibition of FN ligand-receptor interaction in TC pMSC-derived ECM diminished HTR-8/Svneo cell migration** (A) IF analysis of FN (red) and  $\alpha$ 5 $\beta$ 1 integrin (green) in HTR-8/Svneo cells plated on term pMSC-derived ECM exposed to 1 $\mu$ M RGD peptide for 90 min. Scale bars at 63 X magnification represent 7  $\mu$ m. (B – top panel) Representative snapshots of HTR-8/Svneo cell migration over time on ECM deposited by TC pMSCs exposed to 1 $\mu$ M RGD peptide. (B – bottom panel) Graphical representation of HTR-8/Svneo cell migration on pMSC ECM exposed to 1 $\mu$ M RGD peptide, expressed as area of wound closure over time.



## Nanosight Tracker Analysis

**A**

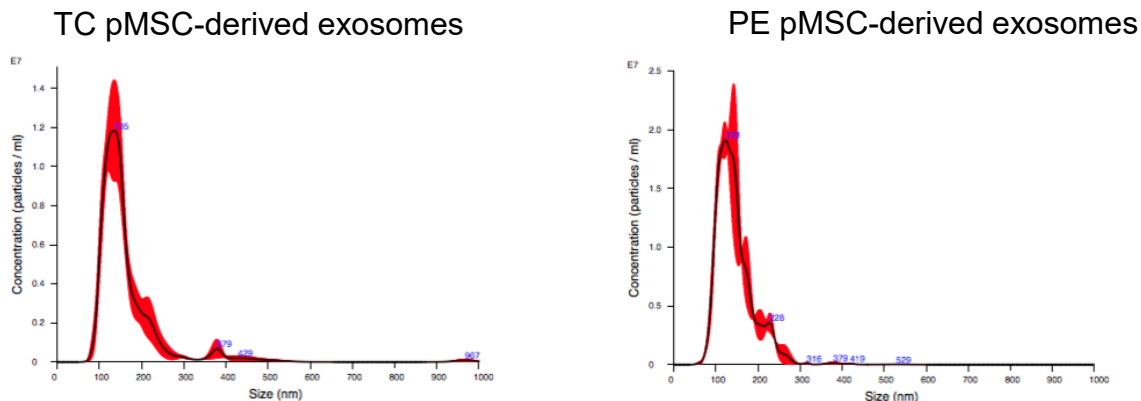

**B**

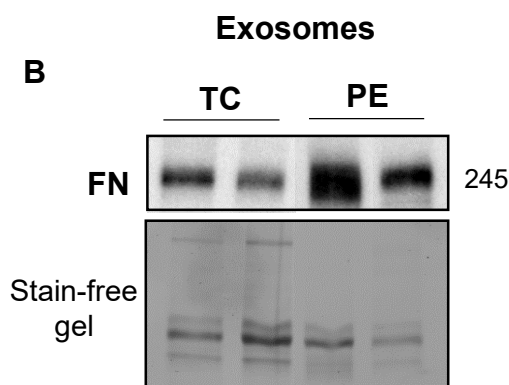

**C**

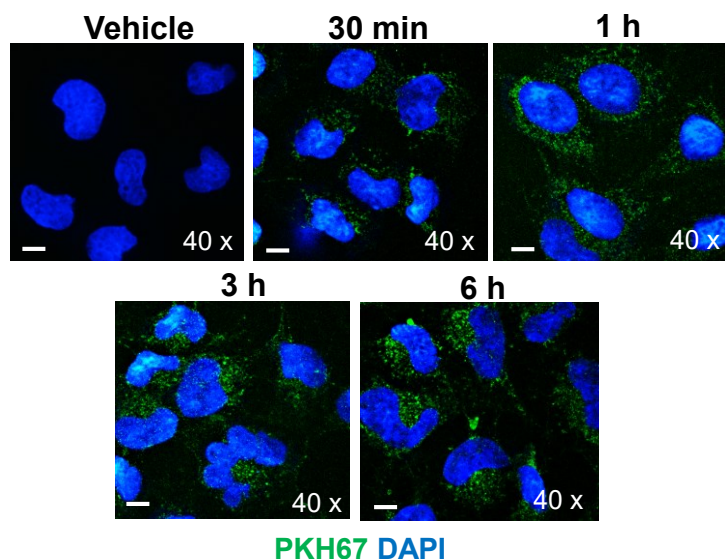

**D**

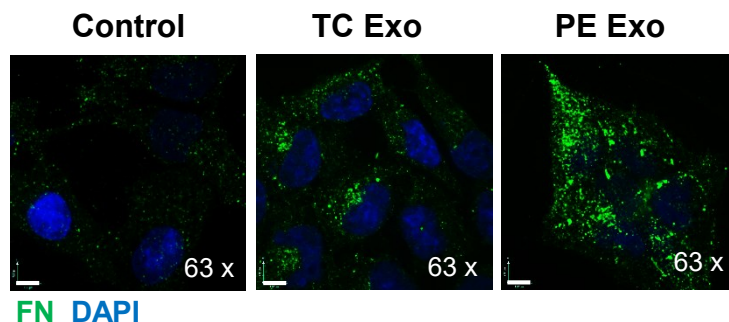

**Supplementary Figure 6 – Fibronectin expression in pMSC-derived exosomes, their uptake and effect on HTR-8/Svneo cells.** (A) Representative Nanosight tracker analysis of TC and PE-derived exosomes isolated from conditioned media. (B) WB for FN in TC and PE pMSC-derived exosomes. (C) IF analysis of PKH67 linker dye (green) marking TC pMSC-derived exosomes uptake by HTR-8/Svneo cells over time. Nuclei were counter-stained with DAPI. (D) IF analysis of FN (green) in HTR-8/Svneo cells exposed to exosomes isolated from TC *versus* PE pMSCs. Nuclei were counter-stained with DAPI. Scale bars at 40 X and 63 X magnification represent 4.44 and 7  $\mu$ m respectively.
